# Supplementary material for: Functional nanoporous materials from boronate-containing stimuli-responsive diblock copolymers
Source: Royal Society of Chemistry journal article supplement (doi:10.1039/d2py00237j), 2022-01-01

## **Functional Nanoporous Materials From Boronate-Containing Stimuli-Responsive Diblock Copolymers**

Erigène Bakangura,<sup>1</sup> David Fournier,<sup>2</sup> Fanny Coumes,<sup>2,3</sup> Patrice Woisel,<sup>2</sup> Daniel Grande<sup>1</sup> & Benjamin Le Droumaguet<sup>1</sup>

<sup>1</sup> *Univ Paris Est Creteil, CNRS, ICMPE, UMR 7182, 2 Rue Henri Dunant, F-94320 Thiais, France  
([ledroumaguet@icmpe.cnrs.fr](mailto:ledroumaguet@icmpe.cnrs.fr))*

<sup>2</sup> *Univ. Lille, CNRS, INRAE, Centrale Lille, UMR 8207 - UMET - Unité Matériaux et Transformations, F-59000 Lille, France*

<sup>3</sup> *Current address : Sorbonne Univ., CNRS, UMR 8232 - IPCM - Institut Parisien de Chimie Moléculaire - Chimie des Polymères (CDP) team, 75252 Paris Cedex 05, France*

### **SUPPORTING INFORMATION**

**Figure S1.**  $^1\text{H}$  NMR spectrum of carboxylic acid functionalized poly(ethylene oxide), PEO-COOH.

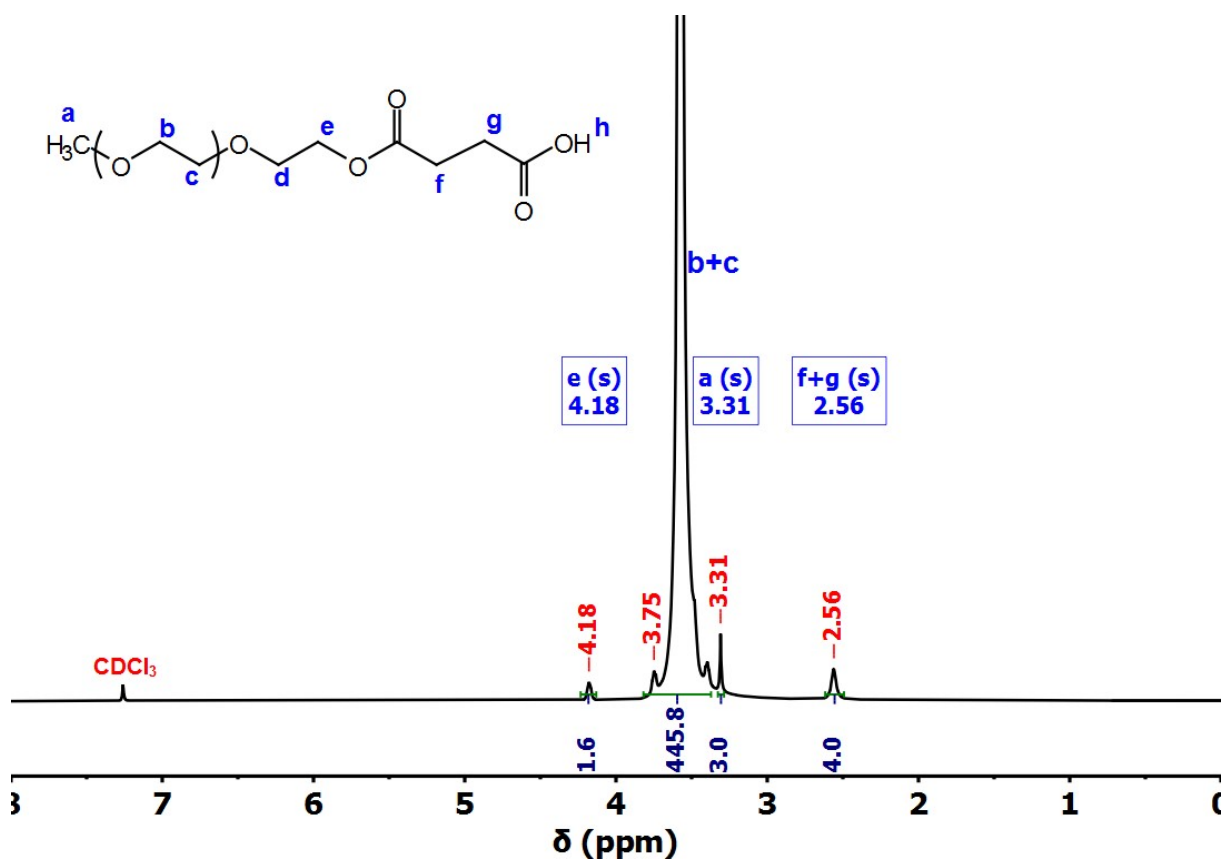

**Figure S2.**  $^1\text{H-NMR}$  spectrum of nitrodopamine (ND).

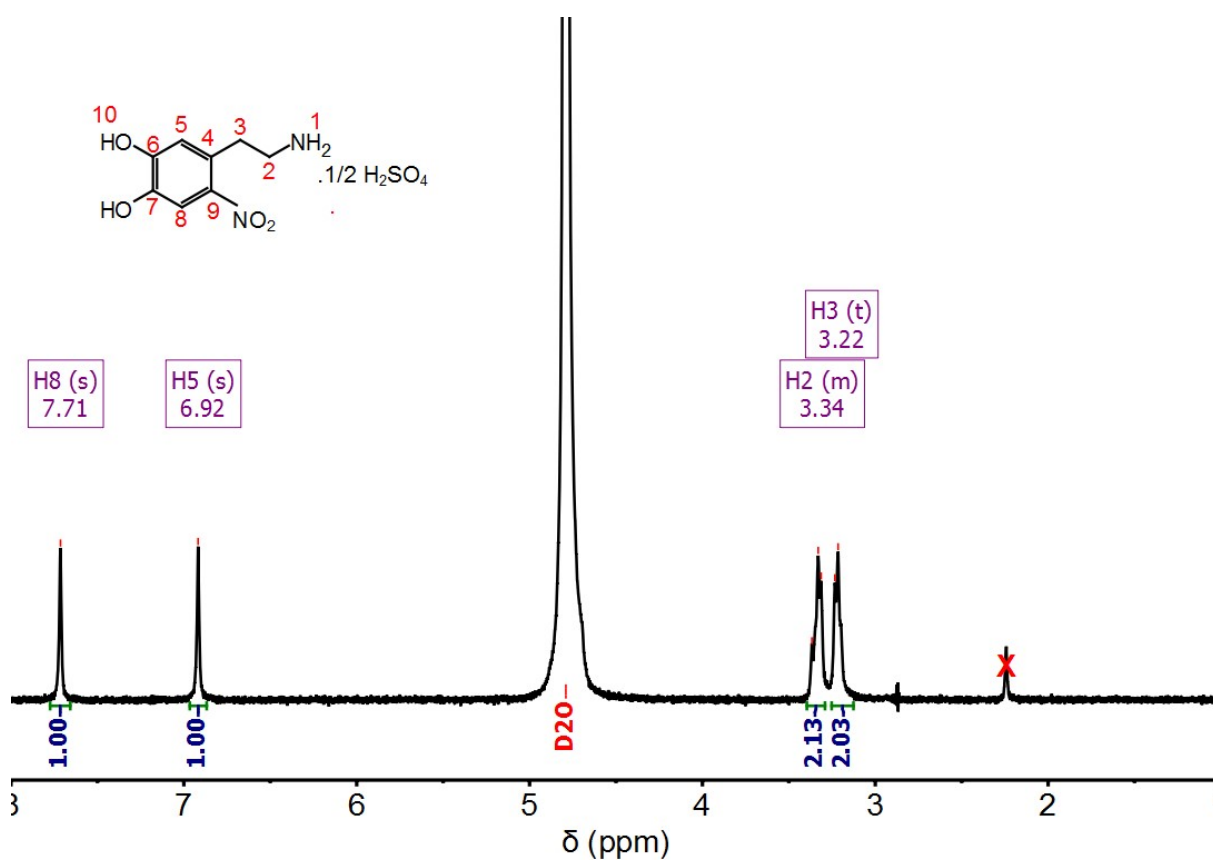

**Figure S3.**  $^{13}\text{C-NMR}$  spectrum of nitrodopamine (ND).

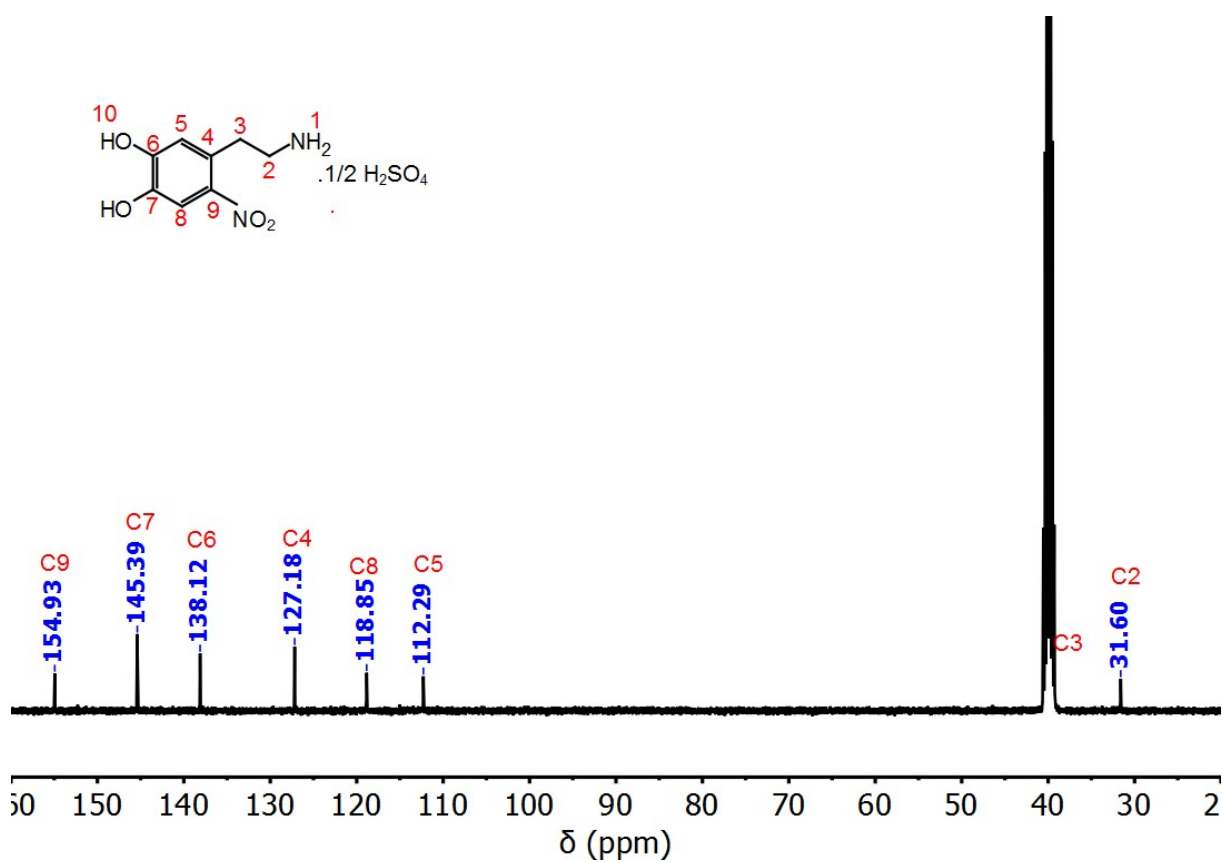

Figure S4.  $^{13}\text{C}$ -DEPT NMR spectrum of nitrodopamine (ND).

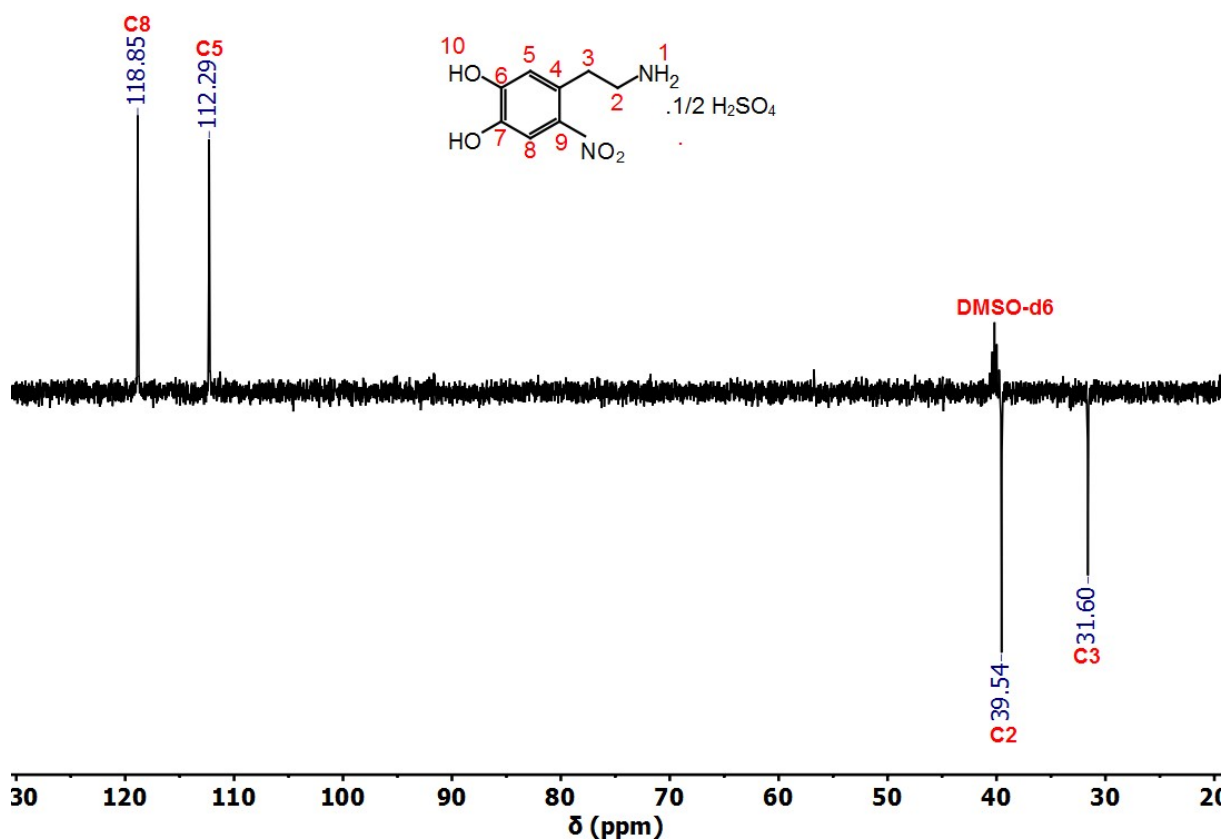

Figure S5. 2-dimensional  $^1\text{H}$ ,  $^{13}\text{C}$ -HQC NMR spectrum of nitrodopamine (ND).

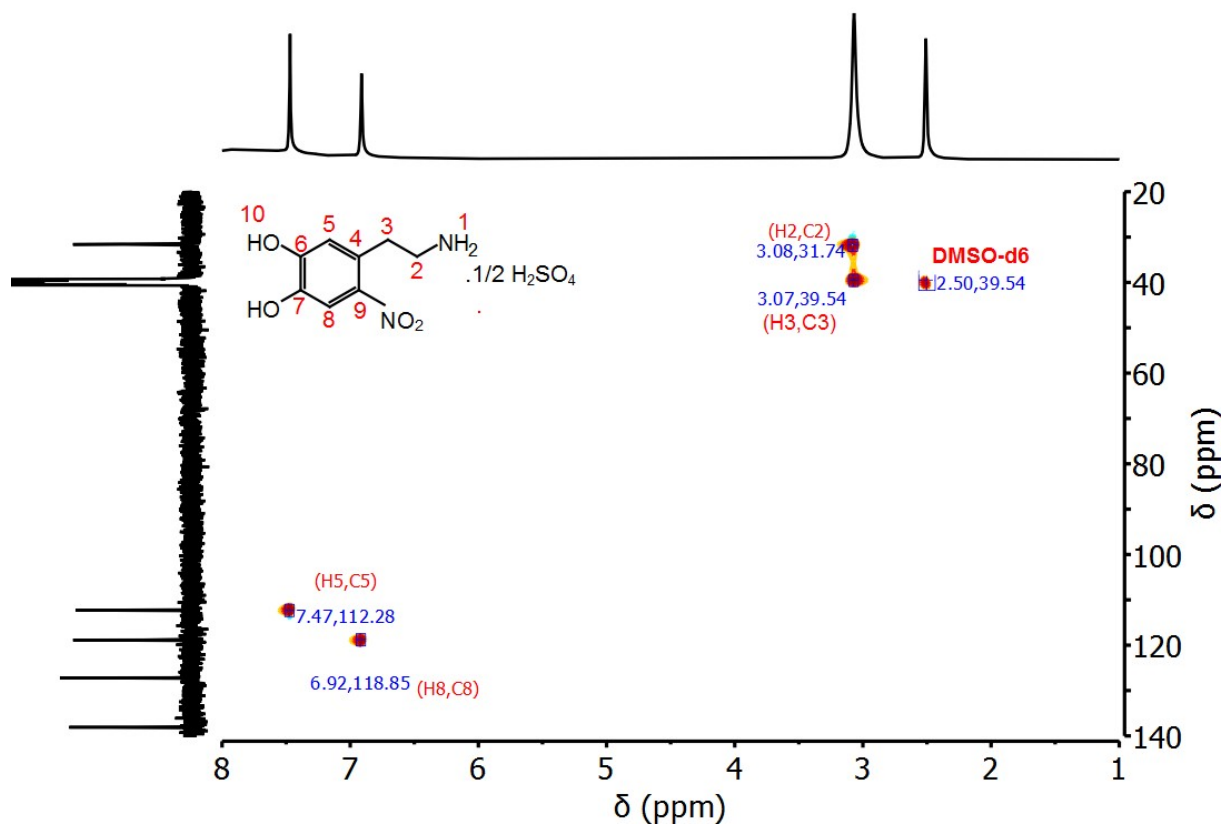

**Figure S6.**  $^1\text{H-NMR}$  spectrum of nitrocatechol functionalized poly(ethylene oxide) (PEO-NC).

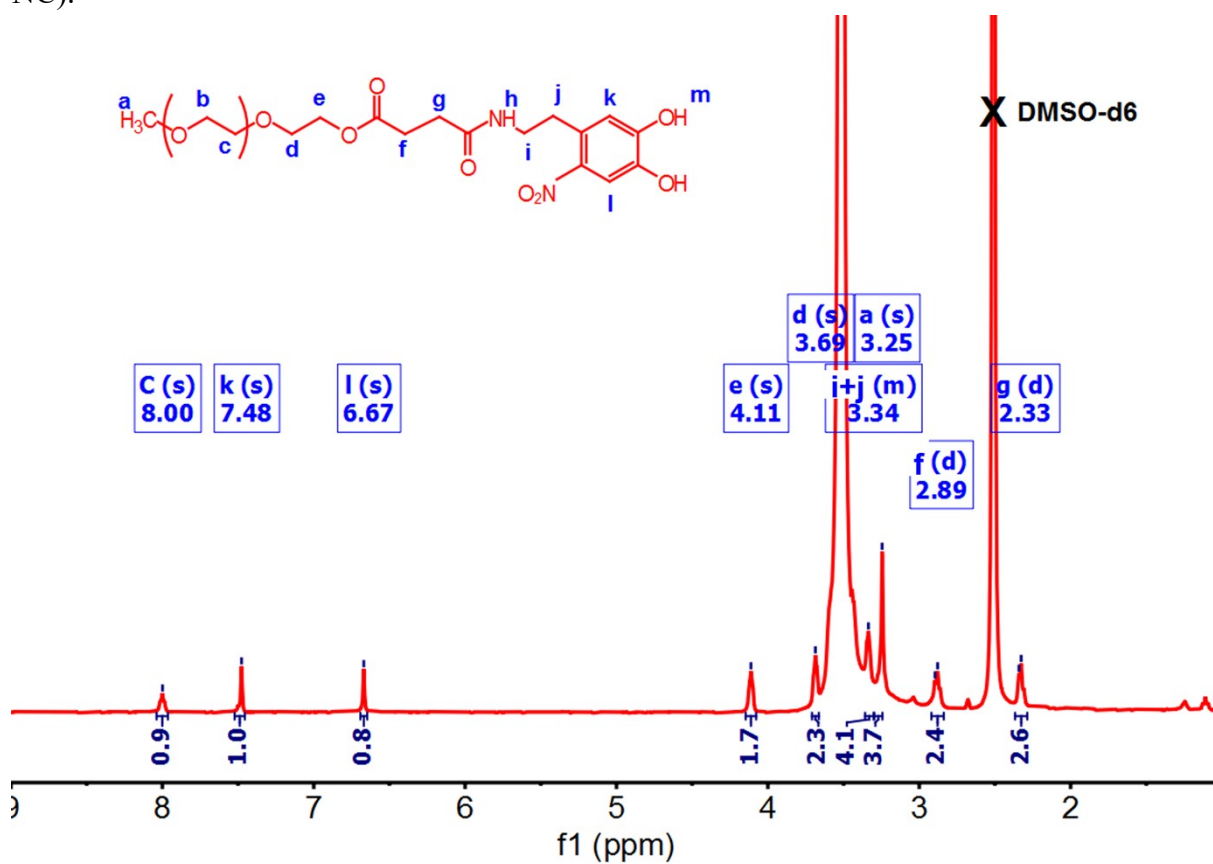

**Figure S7.**  $^1\text{H-NMR}$  spectrum of boronic acid functionalized poly(ethylene oxide) (PEO-Bora)

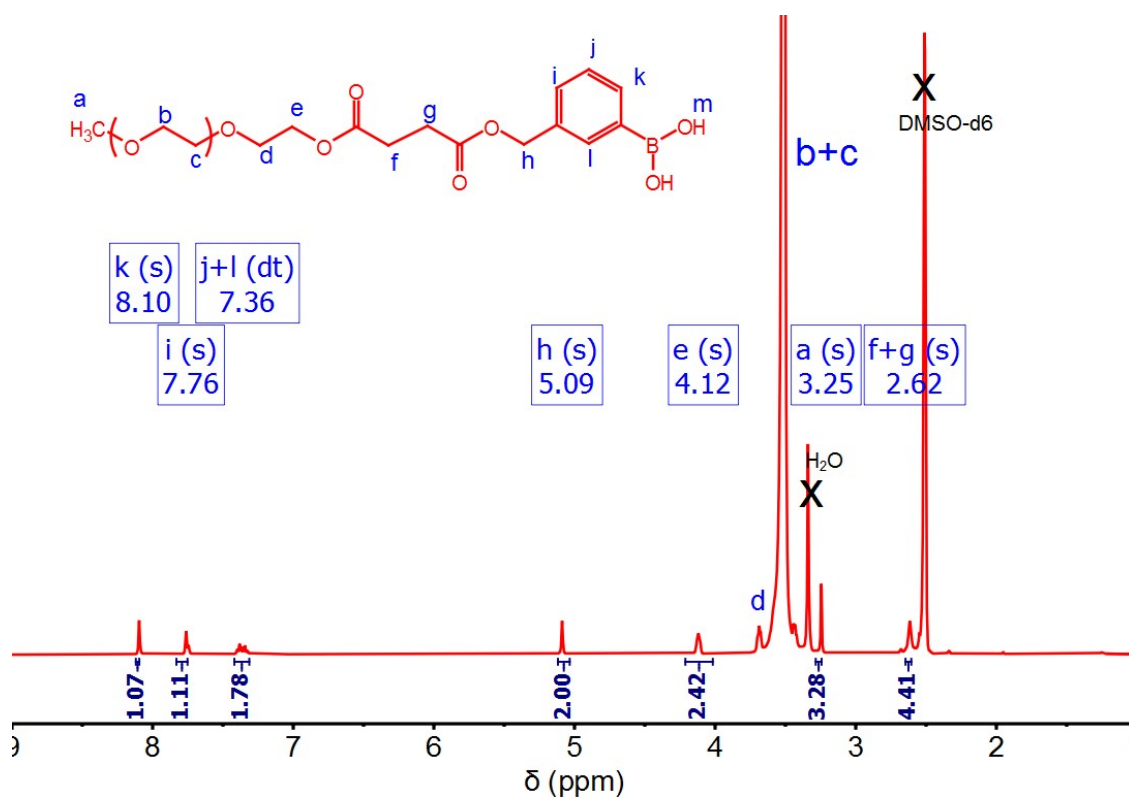

Figure S8.  $^1\text{H-NMR}$  spectrum of DDMAT-NC.

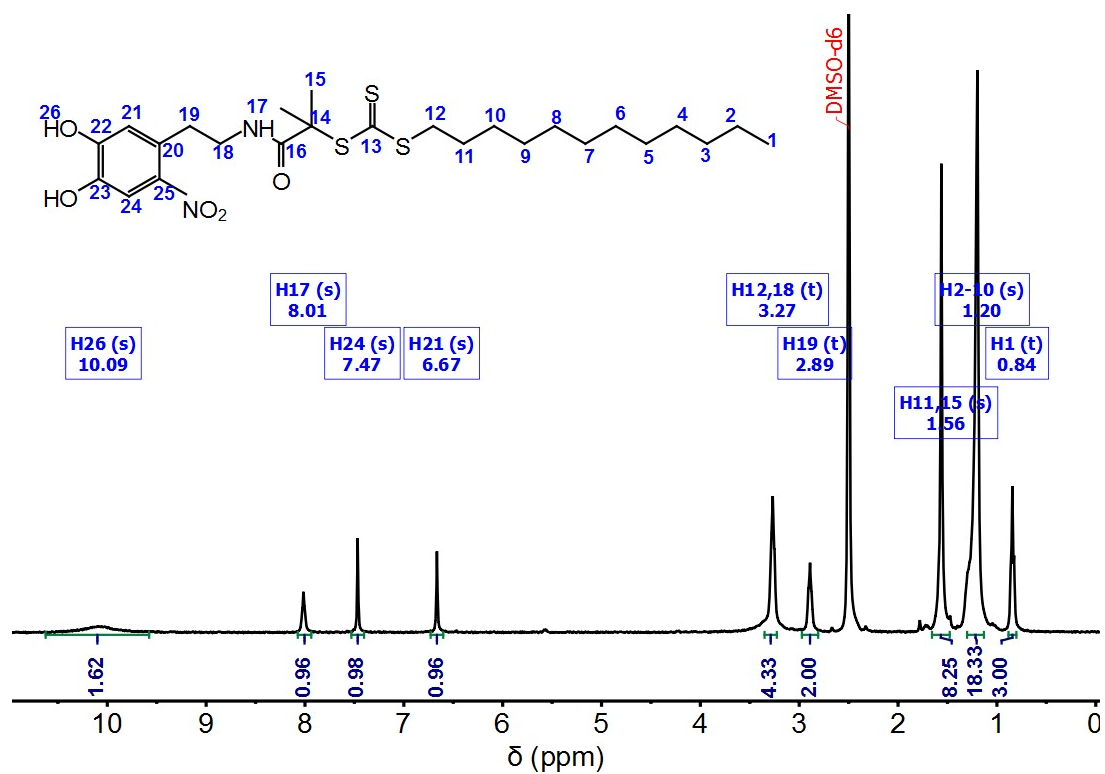

Figure S9.  $^1\text{H-COSY}$  NMR spectrum of DDMAT-NC.

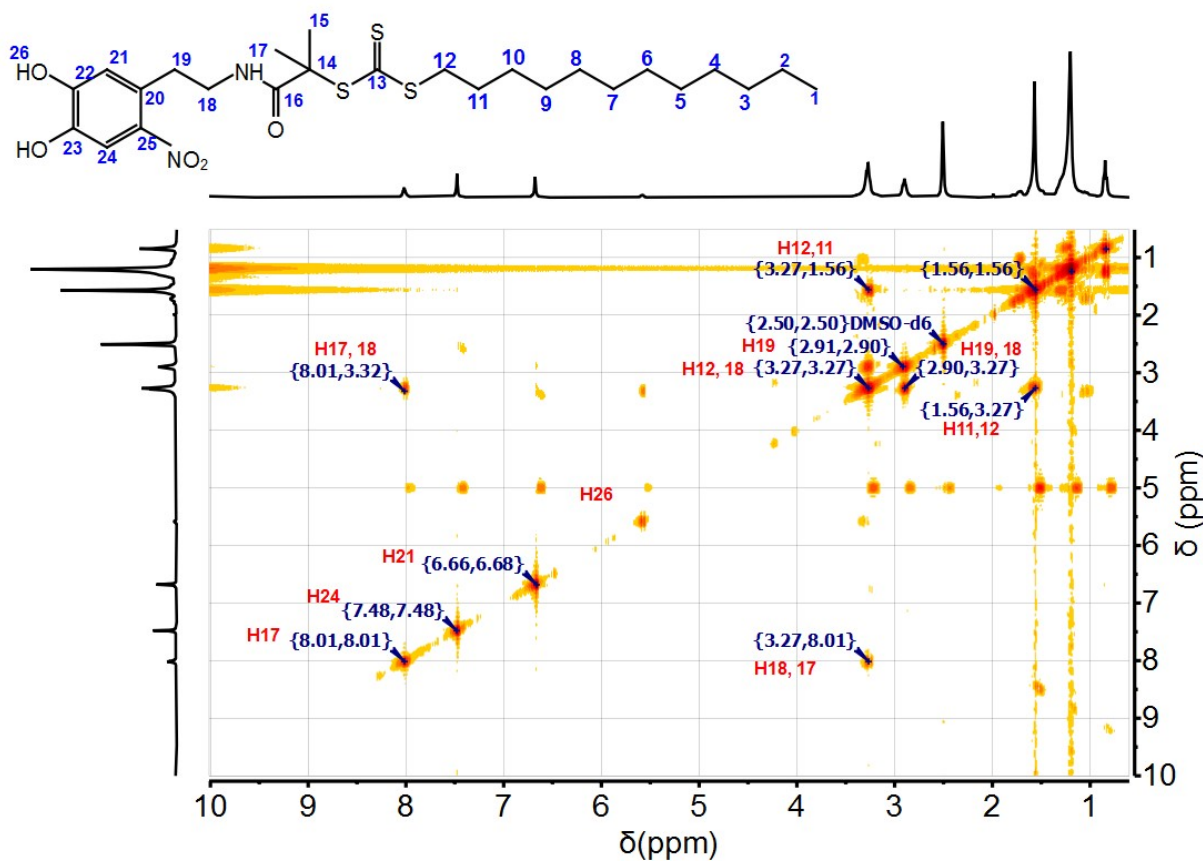

Figure S10. <sup>13</sup>C-NMR spectrum of DDMAT-ND.

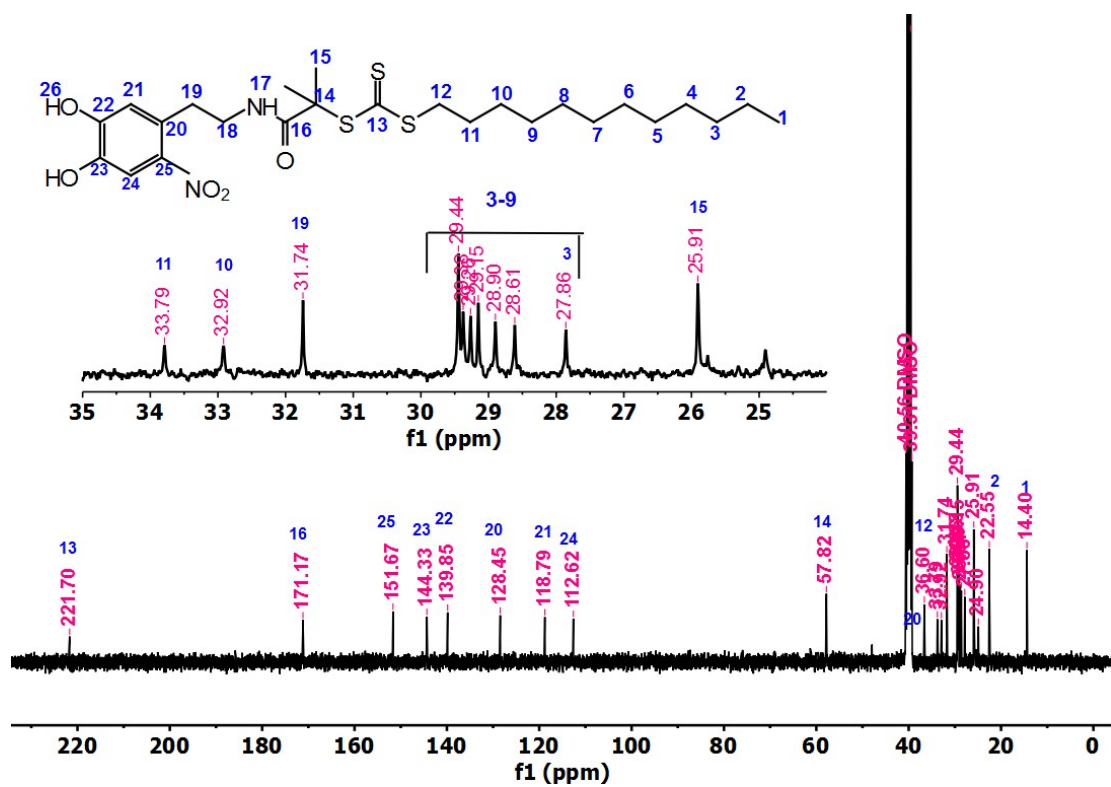

**Figure S11.** 2-dimensional  $^1\text{H}$ ,  $^{13}\text{C}$ -HQC NMR spectrum of DDMAT-ND.

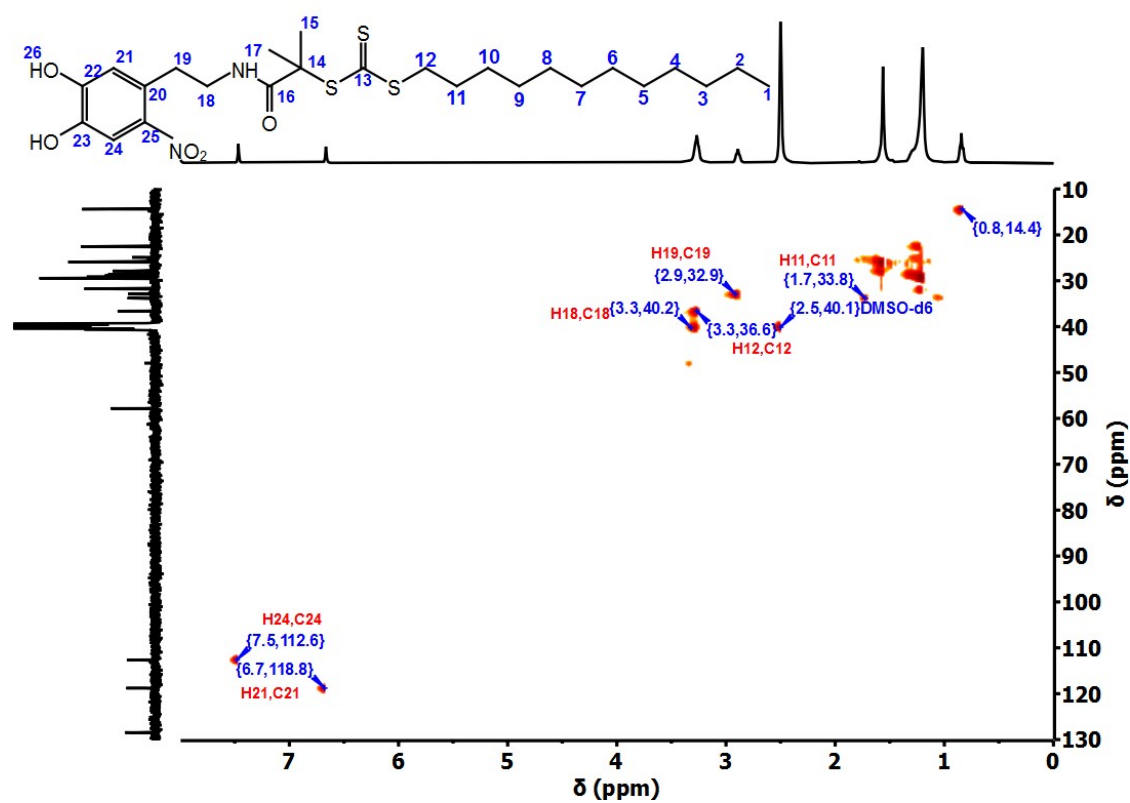

**Figure S12.**  $^1\text{H}$ -NMR spectrum of catechol functionalized polystyrene (PS-NC).

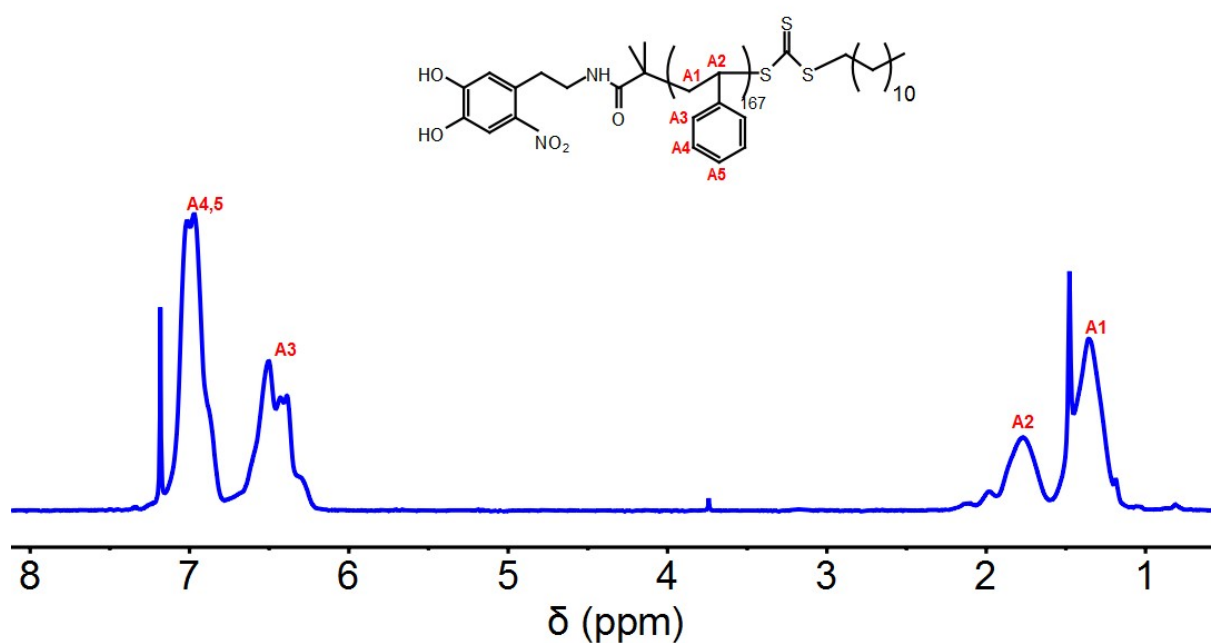

**Figure S13.**  $^1\text{H}$ -NMR spectrum of boronic acid functionalized polystyrene (PS-Bora).



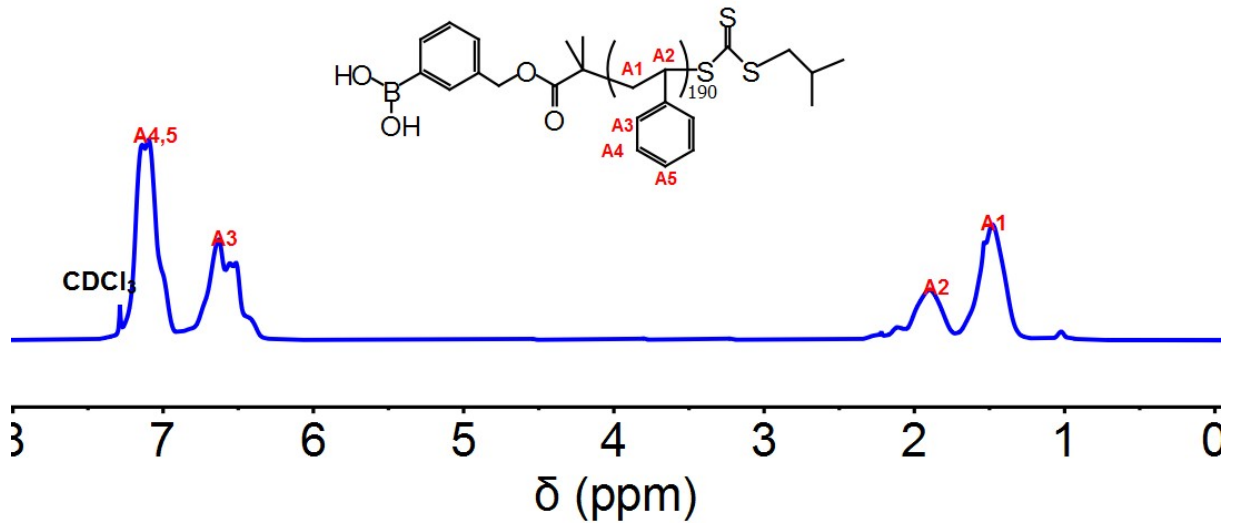



**Figure S16.**  $^1\text{H-NMR}$  spectrum of polystyrene washed out from silicium substrate after selective removal of PEO block.

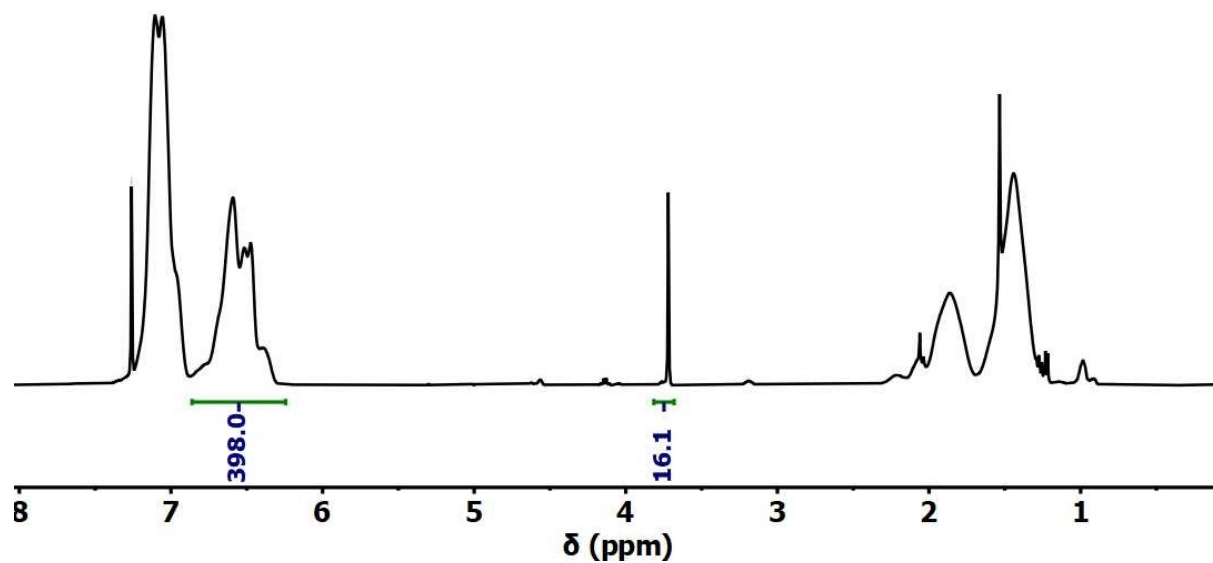

**Figure S17.** SEC trace of the  $\text{PS}_{190}\text{-}b\text{-PEO}_{114}$  diblock copolymer after TFA-mediated selective cleavage of the boronate ester junction using DMF as the eluent at a flowrate of  $1\text{ mL}\cdot\text{min}^{-1}$  at  $50\text{ }^\circ\text{C}$ .

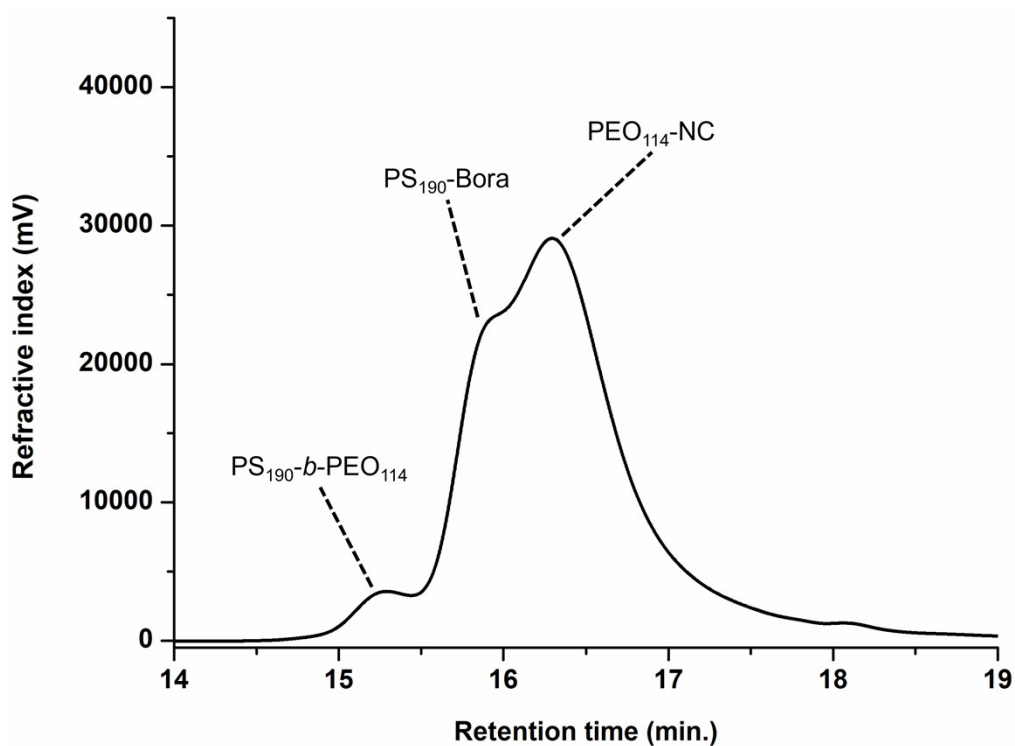

Supplement: d2py00237j1.pdf [file d2py00237j1.pdf]
